# Supplementary material
Source: publisher site journal article supplement (https://www.dovepress.com/article/166710)
Supplement: Supplementary file 1 [file get_supplementary_file.php%3Ff%3D166710.pdf]

**Table S1. Quality assessment of prognosis cohort studies by QUIPS tool**

| <b>Study</b>                    | <b>Study participation</b> | <b>Study attrition</b> | <b>Prognostic factor measurement</b> | <b>Study confounding</b> | <b>Outcome measurement</b> | <b>Statistical analysis and reporting</b> |
|---------------------------------|----------------------------|------------------------|--------------------------------------|--------------------------|----------------------------|-------------------------------------------|
| Zhang et al <sup>12</sup>       | Low risk                   | Low risk               | Low risk                             | Low risk                 | Low risk                   | Low risk                                  |
| Xie et al <sup>13</sup>         | Low risk                   | Low risk               | Low risk                             | Moderate risk            | Low risk                   | Low risk                                  |
| Wu et al <sup>14</sup>          | Low risk                   | Low risk               | Low risk                             | Low risk                 | Low risk                   | Low risk                                  |
| Gu et al <sup>15</sup>          | Low risk                   | Low risk               | Low risk                             | Low risk                 | Moderate                   | Low risk                                  |
| Gershman et al <sup>16</sup>    | Low risk                   | Low risk               | Low risk                             | Low risk                 | Low risk                   | Low risk                                  |
| Chipollini et al <sup>17</sup>  | Low risk                   | Low risk               | Low risk                             | Moderate                 | Low risk                   | Moderate risk                             |
| NguyenHoang et al <sup>18</sup> | Low risk                   | Low risk               | Low risk                             | Low risk                 | Low risk                   | Low risk                                  |
| Khor et al <sup>19</sup>        | Low risk                   | Moderate risk          | Low risk                             | Low risk                 | Low risk                   | Low risk                                  |
| Lee et al <sup>20</sup>         | Low risk                   | Low risk               | Low risk                             | Low risk                 | Low risk                   | Low risk                                  |
| Kara et al <sup>21</sup>        | Low risk                   | Low risk               | Low risk                             | Low risk                 | Low risk                   | Low risk                                  |
| Jeon et al <sup>22</sup>        | Low risk                   | Low risk               | Low risk                             | Low risk                 | Low risk                   | Moderate risk                             |
| Errarte et al <sup>23</sup>     | Moderate risk              | Low risk               | Low risk                             | Low risk                 | Low risk                   | Low risk                                  |
| Yu et al <sup>24</sup>          | Low risk                   | Low risk               | Low risk                             | Low risk                 | Low risk                   | Low risk                                  |
| Schiavina et al <sup>25</sup>   | Low risk                   | Low risk               | Low risk                             | Low risk                 | Low risk                   | Low risk                                  |
| Psutka et al <sup>26</sup>      | Low risk                   | Low risk               | Low risk                             | Moderate risk            | Low risk                   | Low risk                                  |
| Lee et al <sup>27</sup>         | Low risk                   | Low risk               | Low risk                             | Low risk                 | Low risk                   | Moderate                                  |
| Kim et al <sup>28</sup>         | Moderate risk              | Low risk               | Low risk                             | Low risk                 | Low risk                   | Low risk                                  |
| Weiss et al <sup>29</sup>       | Low risk                   | Low risk               | Low risk                             | Low risk                 | Low risk                   | Low risk                                  |

|                                |               |          |          |               |               |               |
|--------------------------------|---------------|----------|----------|---------------|---------------|---------------|
| Teng et al <sup>30</sup>       | Low risk      | Low risk | Low risk | Moderate risk | Low risk      | Low risk      |
| Haddad et al <sup>31</sup>     | Low risk      | Low risk | Low risk | Low risk      | Low risk      | Low risk      |
| El-Mokadem et al <sup>32</sup> | Moderate risk | Low risk | Low risk | Low risk      | Low risk      | Low risk      |
| Tosco et al <sup>33</sup>      | Low risk      | Low risk | Low risk | Low risk      | Low risk      | Low risk      |
| Kruck et al <sup>34</sup>      | Low risk      | Low risk | Low risk | Moderate risk | Low risk      | Low risk      |
| Kondo et al <sup>35</sup>      | Moderate risk | Low risk | Low risk | Low risk      | Low risk      | Low risk      |
| Volpe et al <sup>36</sup>      | Low risk risk | Low risk | Low risk | Low risk      | Low risk      | Low risk      |
| Sukov et al <sup>37</sup>      | Low risk      | Low risk | Low risk | Moderate risk | Low risk      | Moderate risk |
| Sameh et al <sup>38</sup>      | Low risk      | Low risk | Low risk | Low risk      | Low risk      | Low risk      |
| Ku et al <sup>39</sup>         | Moderate risk | Low risk | Low risk | Low risk      | Low risk      | Low risk      |
| Rodríguez et al <sup>40</sup>  | Low risk      | Low risk | Low risk | Low risk      | Low risk      | Low risk      |
| Poon et al <sup>41</sup>       | Low risk      | Low risk | Low risk | Low risk      | Low risk      | Low risk      |
| Klatte et al <sup>42</sup>     | Low risk      | Low risk | Low risk | Moderate risk | Low risk      | Low risk      |
| Coons et al <sup>43</sup>      | Low risk      | Low risk | Low risk | Moderate risk | Low risk      | Low risk      |
| Kwak et al <sup>44</sup>       | Low risk      | Low risk | Low risk | Low risk      | Low risk      | Moderate risk |
| Lee et al <sup>45</sup>        | Low risk      | Low risk | Low risk | Low risk      | Low risk      | Low risk      |
| Sanchez et al <sup>46</sup>    | Low risk      | Low risk | Low risk | Low risk      | Moderate risk | Low risk      |

**Supplementary Figure 1. Forest plots of the association between sarcomatoid differentiation and clinicopathological features of RCC: A) TNM stage, (B) Fuhrman grade, (C) lymph node involvement, (D) pathological types,(E) gender and (F) average age.**

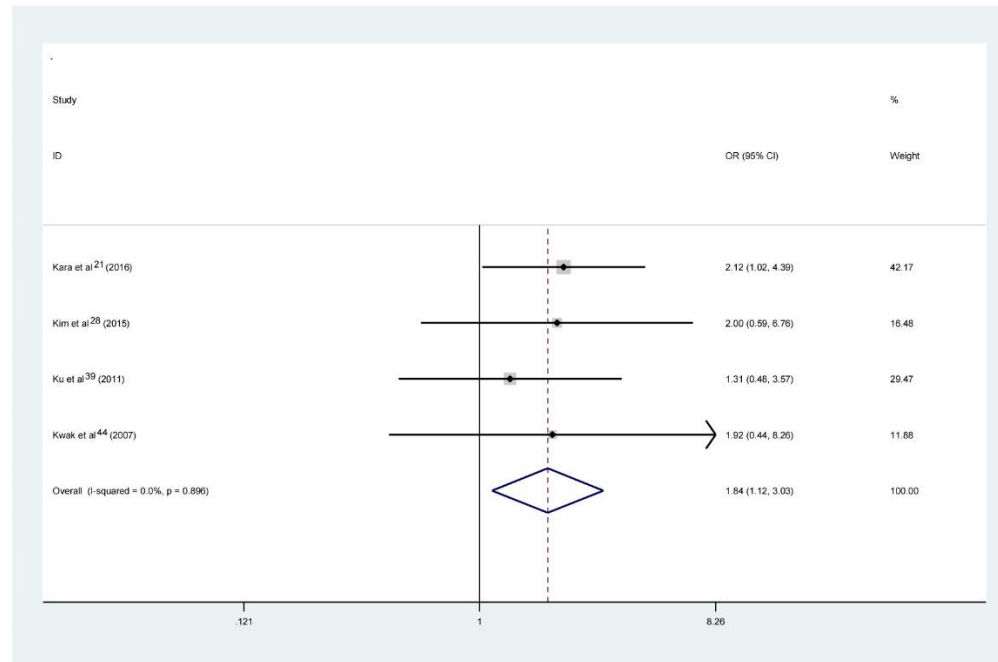

Supplementary Figure 1A

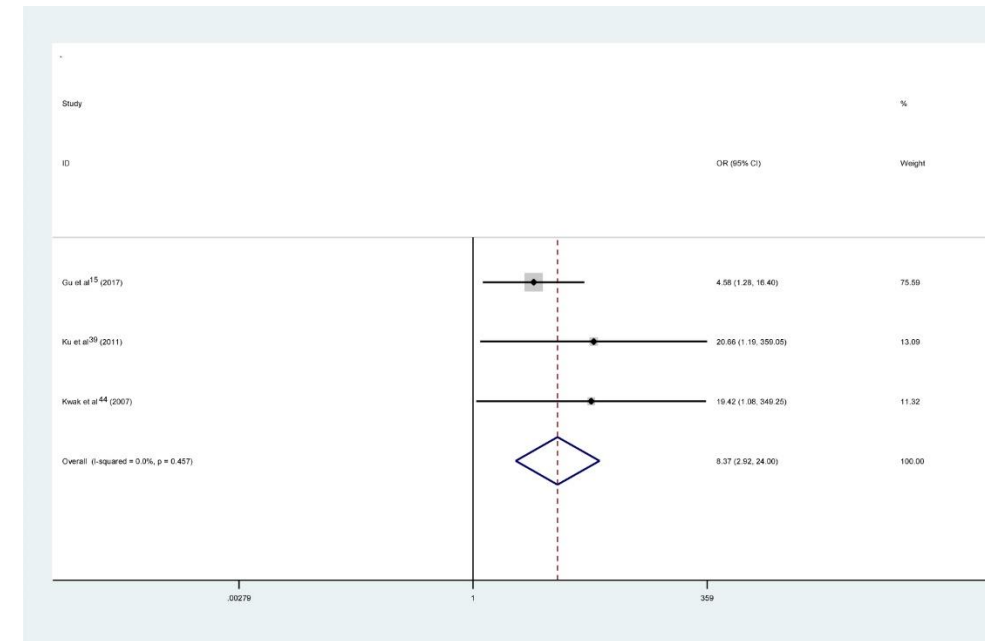

Supplementary Figure 1B

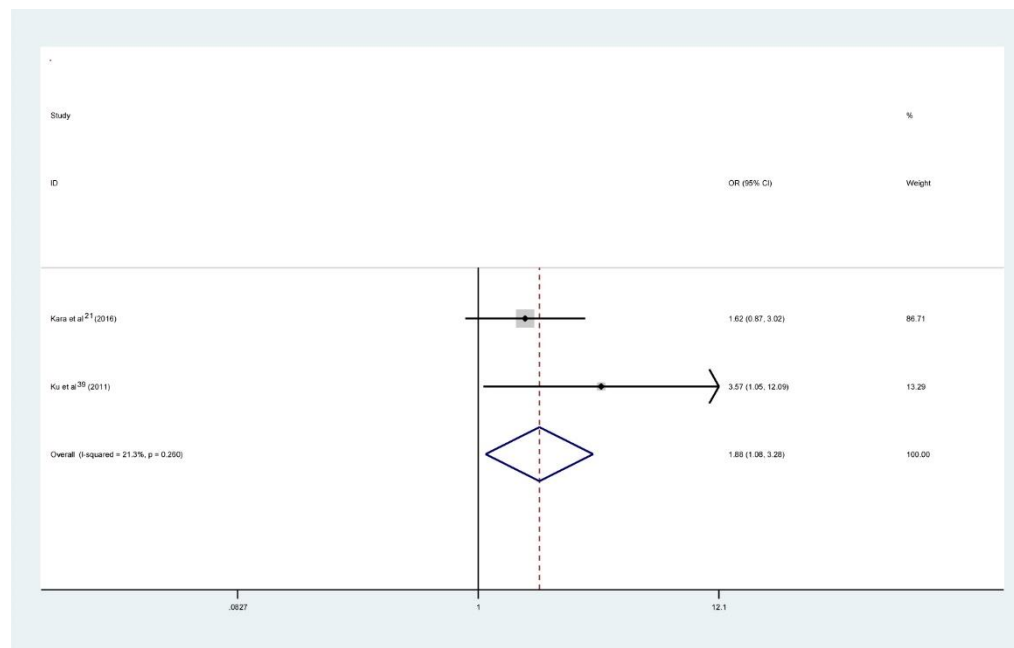

Supplementary Figure 1C

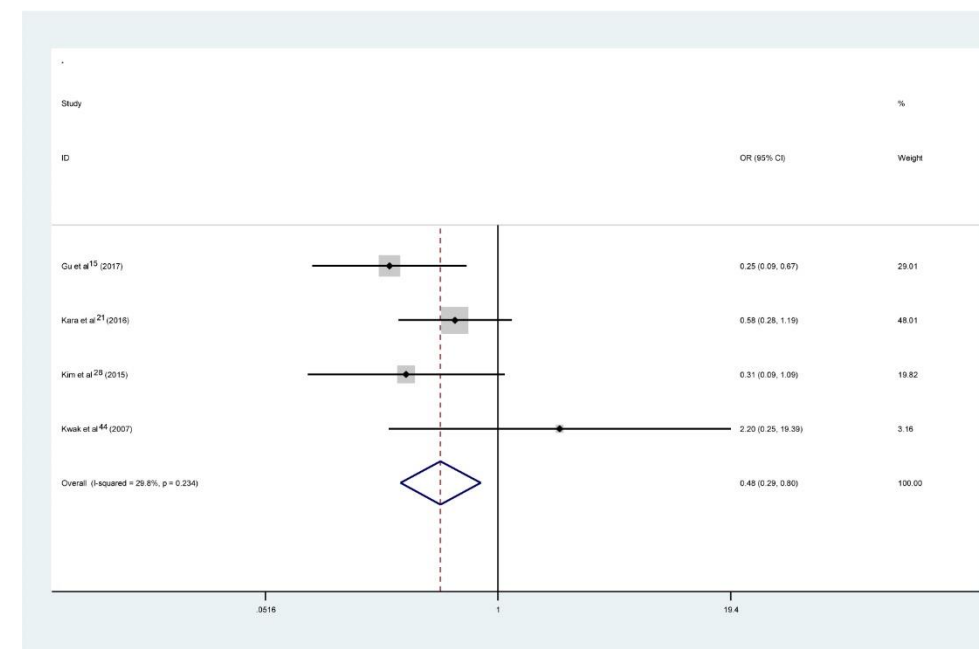

Supplementary Figure 1D

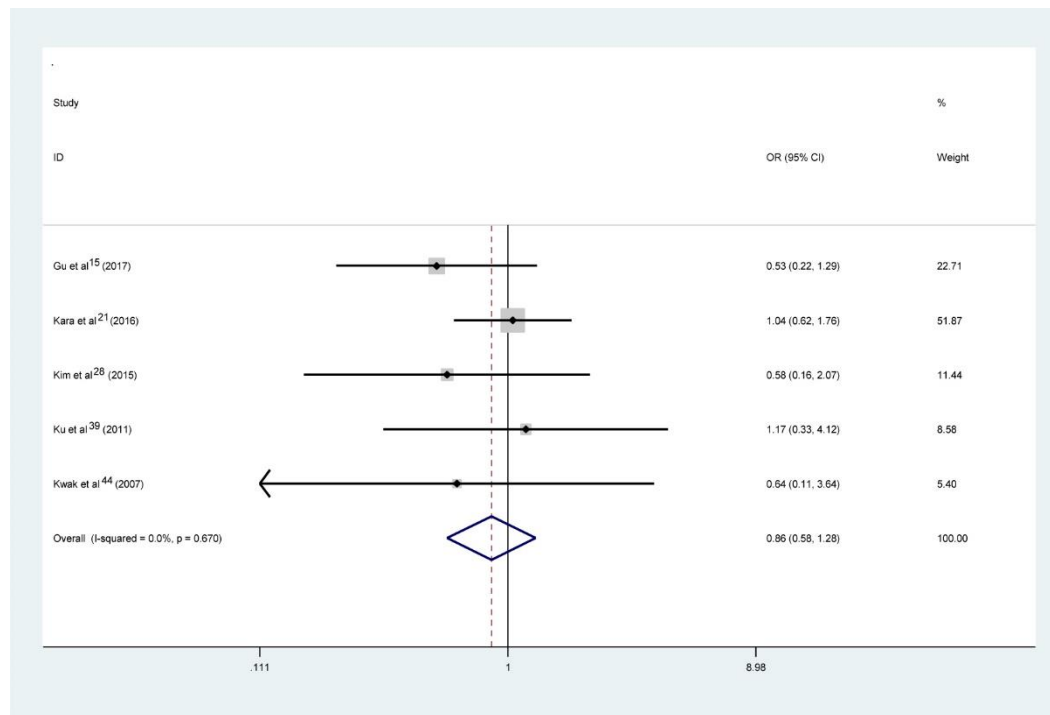

Supplementary Figure 1E

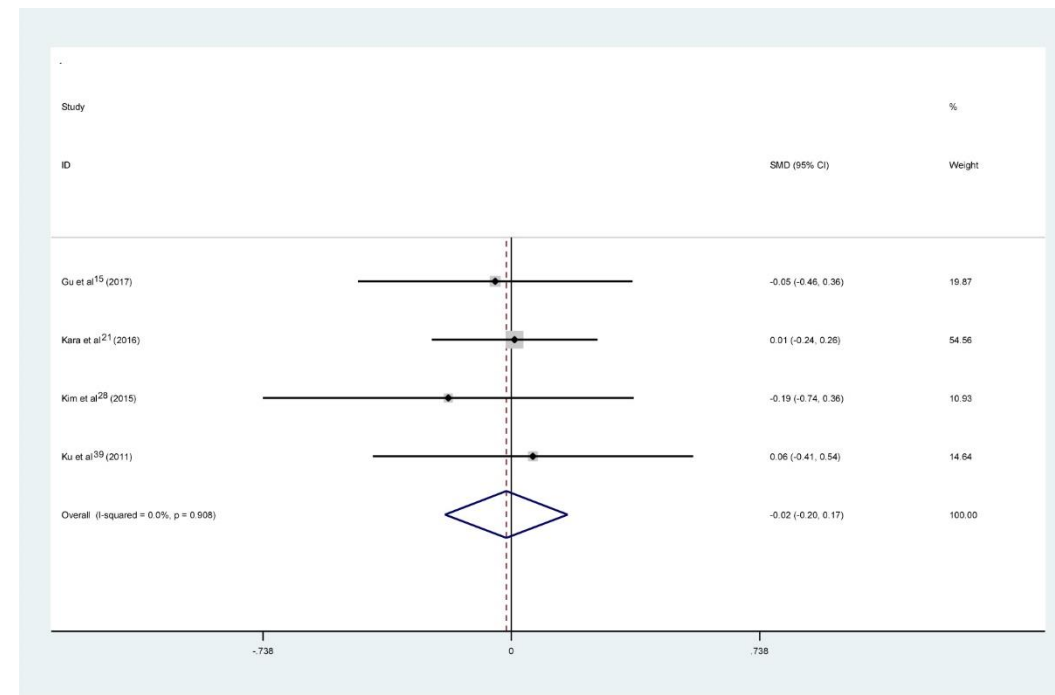

Supplementary Figure 1F

**Supplementary Figure 2. Sensitivity analysis in this meta-analysis. (A) Sensitivity analysis for CSS; (B) Sensitivity analysis for OS; (C) Sensitivity analysis for PFS; (D) Sensitivity analysis for RFS; (E) Sensitivity analysis for CSM**

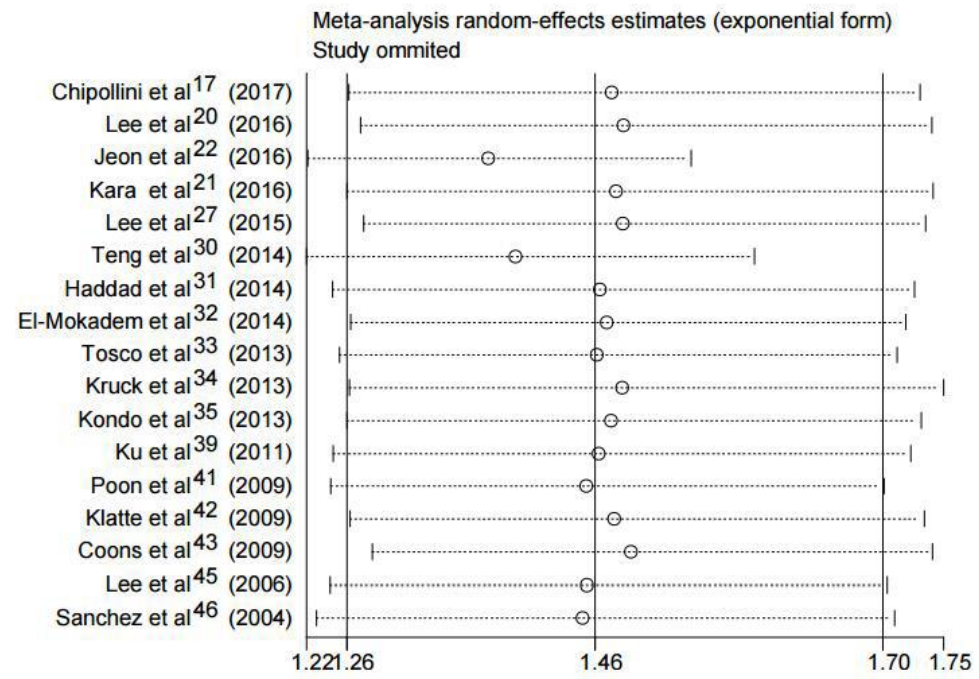

Supplementary Figure 2A

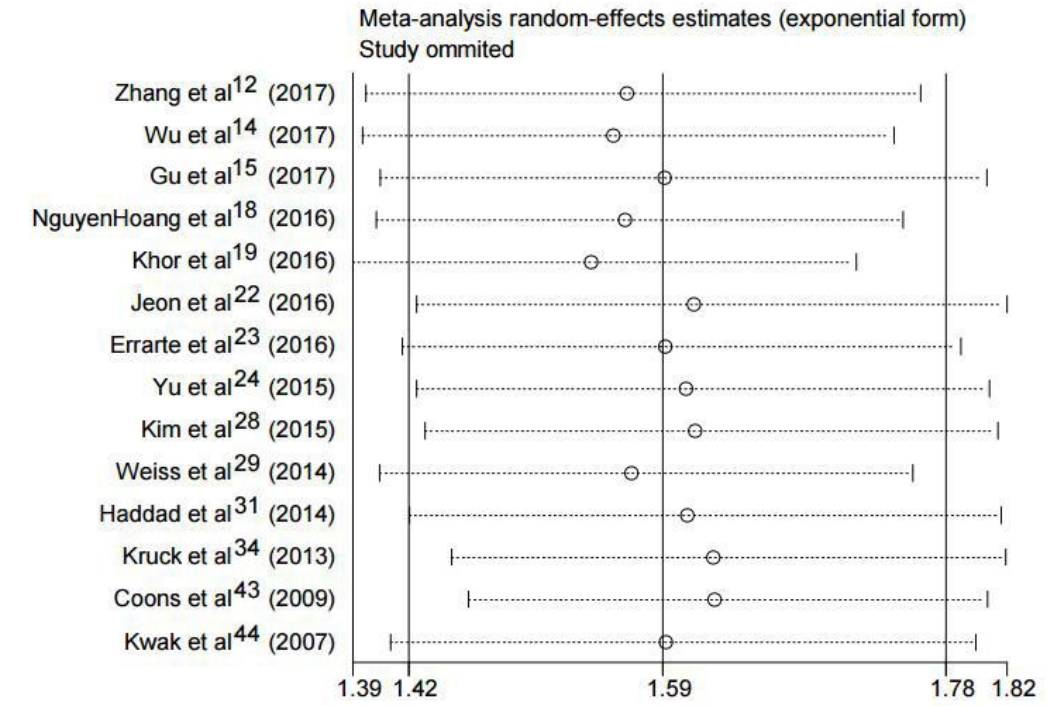

Supplementary Figure 2B

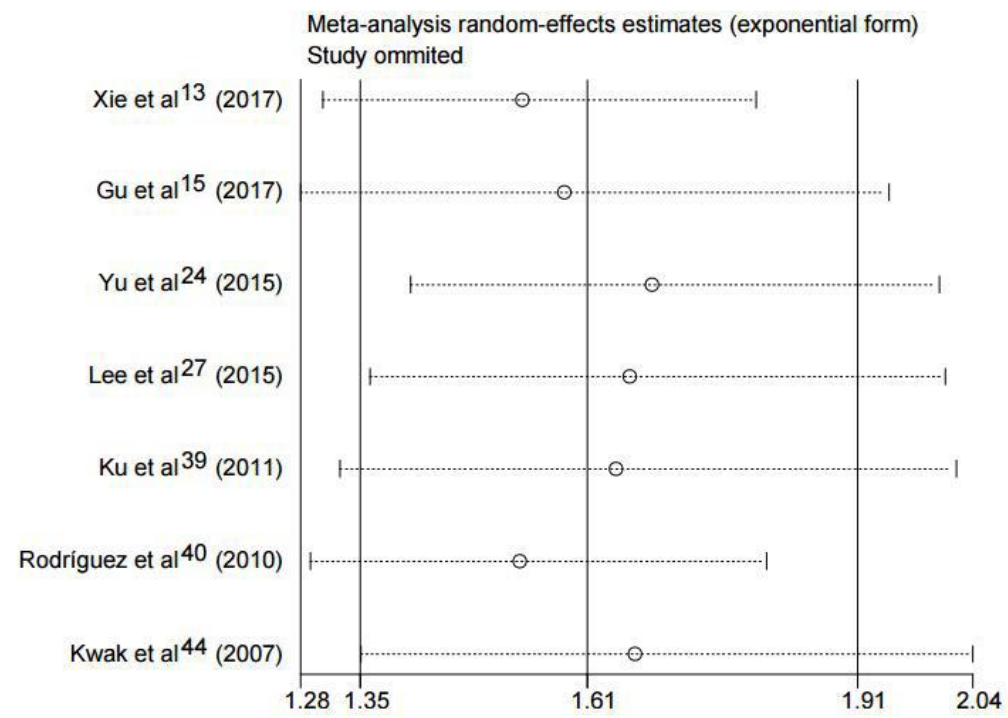

Supplementary Figure 2C

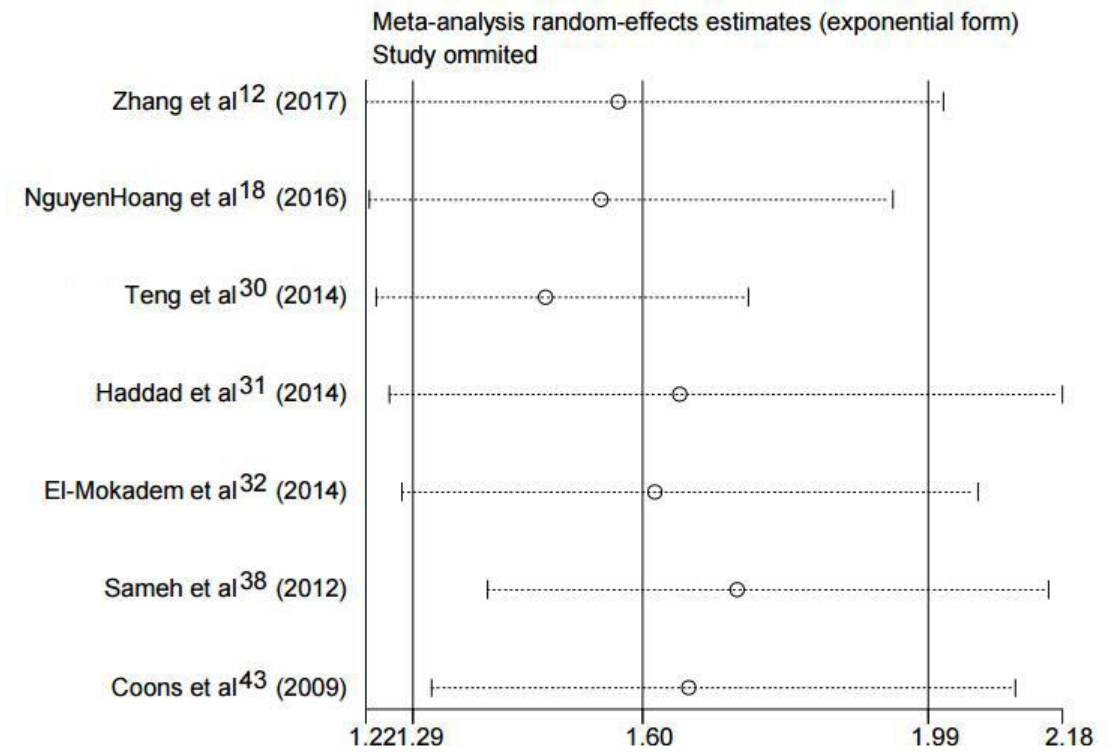

Supplementary Figure 2D

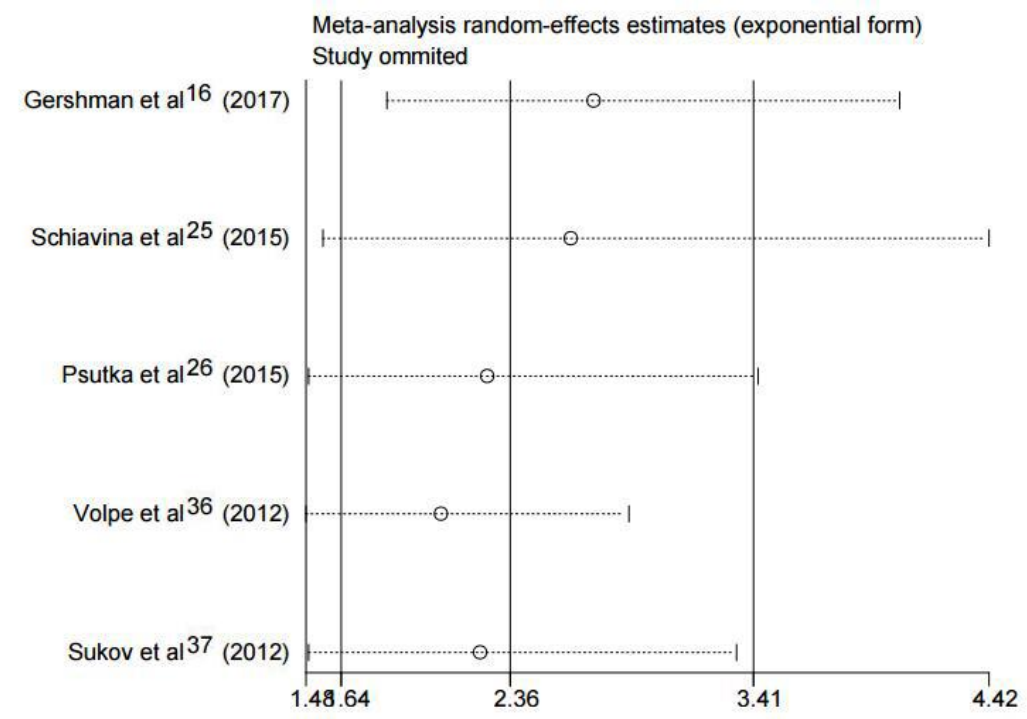

Supplementary Figure 2E
